# Supplementary material
Source: PubMed Central journal article supplement (PMC5799811)
Supplement: cr2017143x1.pdf [file cr2017143x1.pdf]

## **Supplementary Methods**

### ***Mice***

*Mettl3* floxed mice, *Vec-Cre* mice and *Vav-Cre* mice (gifts from B. Liu, Academy of Military Medical Sciences, Beijing, China) were generated as previously described [1, 2]. All mice were C57BL/6 genetic background and were bred under specific-pathogen free conditions. *Vec-Cre; Mettl3<sup>fl/+</sup>* and *Vav-Cre; Mettl3<sup>fl/+</sup>* mice mated with *Mettl3<sup>fl/fl</sup>* mice, respectively, were utilized to obtain *Vec-Cre; Mettl3<sup>fl/fl</sup>* and *Vav-Cre; Mettl3<sup>fl/fl</sup>* embryos. The number of somite pairs (sp) of embryos was counted and the E10.5 embryos with 35-40 sp were chosen in this study. In the following transplantation experiments, the embryos we used were the late E10.5 embryos with 39-40 sp. This study was approved by the Ethical Review Committee of the Institute of Zoology, Chinese Academy of Sciences, China.

### ***Immunofluorescence***

The E10.5 embryo was fixed with 4% paraformaldehyde in PBS overnight at 4°C. After gradient dehydrating, the embryo was embedded in paraffin and sectioned to 5 µm thickness slides. The antigen-retrieved slides were blocked with 5% BSA containing 0.3% Triton X-100 in PBS for 2 h at room temperature. After washing in PBS three times, the slides were incubated with primary antibodies diluted in 1% BSA overnight at 4°C. After washing in PBST (containing 0.1% Tween-20) three times, the slides were then incubated with secondary antibodies diluted in 1% BSA for 2 h at room temperature. The cell nuclei of slides were stained with DAPI and the immunofluorescence images were obtained by a laser scanning confocal microscope (A1; Nikon). The antibodies used in the assays include: anti-Mettl3 antibody (Abnova, H00056339-B01P), anti-Runx1 antibody (abcam, ab92336), anti-CD31 antibody (abcam, ab56299), anti-Notch1 antibody (abcam, ab65297), anti-Dll4 (abcam, ab7280), anti-rabbit-Ig-fluorescein (Life Technologies, A11037), anti-rat-Ig-fluorescein (Life Technologies, A11006) and anti-mouse-Ig-fluorescein (Life Technologies, A11001).

### ***Western blotting***

The E10.5 AGM protein was extracted with RIPA lysis buffer. The procedure was performed

as previously reported [3]. The following antibodies were used to detect the protein levels: anti-Mettl3 antibody (abcam, ab98009) and anti-Dll4 antibody (abcam, ab7280).

### ***qPCR***

The total RNA of AGM region was extracted using TRIzol reagent (TIANGEN, DP405). The cDNA template of qPCR was obtained by M-MLV reverse transcription. The qPCR experiment was performed using Bio-Rad CFX96 detection systems. The housekeeping gene *Gapdh* was used as internal control. Three independent technique replicates were analyzed. The sequences of qPCR primers used in the study are listed in Table S1.

### ***m<sup>6</sup>A-RIP-qPCR***

The m<sup>6</sup>A immunoprecipitation procedure was performed according to the previously published protocol [4]. The level of m<sup>6</sup>A enrichment was assessed by qPCR. The sequences of primers are listed in Table S1.

### ***Colony-forming unit culture assay***

The E10.5 AGM was dispersed into single-cell suspension by collagenase treatment and then cultivated in M3434 medium (Stem Cell Technologies, 03434). After cultured under 5% CO<sub>2</sub> at 37°C for 7 d. The count of each type of colony was based on the colony morphology. More than three groups of independent experiments were analyzed.

### ***Flow cytometry analysis***

Single-cell suspension from the E10.5 AGM was dissociated with collagenase treatment and stained with antibodies for 30 mins at 4°C. Flow cytometry analysis was performed using MoFlo XDP (Beckman Coulter). Two parameters, FSC and SSC, were used to enrich the living and active cells, and the agminate cell populations were gated to analyze the proportion of target cells. The antibodies used in this study include: CD31-PE (BD, 561073), CD144-PE (eBioscience, 12-1441-80), c-Kit-APC (eBioscience, 17-1171-81), CD45-FITC (eBioscience, 11-0451-81), CD34-PE (BD, 551387), CD45.1-APC (eBioscience, 17-0453-82), and CD45.2-PE-Cy7 (eBioscience, 25-0454-80).

### ***Transplantation***

The late E10.5 (39-40 sp) embryos were transferred into medium at 37°C to maintain their robust activity and the tail tissues were obtained from the embryos for genotyping. Then the CD45.1 recipients received a split lethal dose (9 Gy) of X-Ray irradiation, and bone marrow (BM) cells were obtained from CD45.1 mice. When these preparations had been done, the AGM tissues were separated from donor embryos and dispersed into single-cell suspensions. Next, the single-cell suspensions were mixed with  $2 \times 10^6$  BM cells and intravenously injected into the tail of recipients. The chimerism of survived recipient was analyzed using peripheral blood (PB).

### ***mRNA purification and RNA sequencing***

Total RNAs from control and *Vec-Cre; Mettl3<sup>fl/fl</sup>* AGM region of embryos at E10.5 were extracted with TRIzol (TIANGEN, DP405). cDNA libraries were constructed by using KAPA Stranded mRNA-Seq Kit (KAPA) as manufacturer's instructions. Sequencing was performed on Illumina HiSeq2500 with paired end 150-bp read length.

### ***Sequencing data analysis***

For RNA-seq, adaptor sequences were trimmed off for all raw reads using the Cutadapt software (version 1.2.1) [5]. Reads that were less than 35 nt in length or contained an ambiguous nucleotide were discarded by Trimmomatic (version 0.32) [6]. The remaining reads were aligned to the mouse genome (version mm10) using HISAT2 (version 2.0.1) [7]. Only uniquely-mapped reads with mapping quality score  $\geq 20$  were kept for the subsequent analysis for each sample. The number of reads mapped to each Ensembl gene (release 69) was counted using the HTSeq python package [8], with the 'union' overlap resolution mode and unstranded count feature by setting '--mode=union' and '--stranded=rev', respectively. The expression of transcripts was quantified as reads per kilobase of exon model per million mapped reads (RPKM).

### ***Statistical analysis of differentially expressed genes***

Differentially-expressed genes between control and *Vec-Cre; Mettl3<sup>fl/fl</sup>* embryos were determined using the R-package DEGseq with the method MARS (MA-plot-based method with random sampling model), fold change cutoff = 1.2, *p* value cutoff =  $1 \times 10^{-3}$  and RPKM  $\geq$  1 for each sample [9].

### ***KEGG pathway and GSEA analysis***

KEGG (Kyoto Encyclopedia of Genes and Genomes) pathway analysis of genes with significantly differential expression changes was performed using DAVID (<http://david.abcc.ncifcrf.gov/>). Pathways with *p* < 0.05 were determined to be statistically significant. And the expression levels of total genes involved in Notch signaling pathway (annotated as mmu04330 in KEGG database) were analyzed using Gene-Set Enrichment Analysis (GSEA) [10, 11].

### ***m<sup>6</sup>A peak and Ythdf2 cluster***

m<sup>6</sup>A peak data was obtained from Gene Expression Omnibus (GEO) with accession number GSE61995 [12]. Ythdf2 cluster identified by PAR-CLIP-seq in human was derived from GSE49339 [13] and converted to mouse genome by coordinates and annotation files between assemblies using online toolkit LiftOver. (<https://www.genome.ucsc.edu/cgi-bin/hgLiftOver>).

### ***Data availability statement***

The RNA-seq data was deposited in the Genome Sequence Archive [14] in BIG Data Center [15], Beijing Institute of Genomics (BIG), Chinese Academy of Sciences, under accession number PRJCA000601. All other data generated or analyzed during this study were included in the article and Supplementary information.

### ***Statistical analyses***

All experiments were performed at least three times. The data were shown as the mean  $\pm$  standard error of the mean (SEM). Student's *t*-test was used for statistical comparisons, *p*

values were used to examine significance.

**Supplementary Table 1. qPCR primers list used in this work.**

| Primer name                          | Primer sequence (5' to 3') | Length (bp) |
|--------------------------------------|----------------------------|-------------|
| <i>Gapdh</i> F                       | TCCCACTCTTCCACCTTCGATGC    | 247         |
| <i>Gapdh</i> R                       | GGGTCTGGGATGGAAATTGTGAGG   |             |
| <i>Runx1</i> F                       | GCCTCTCTGCAGAACTTTCC       | 88          |
| <i>Runx1</i> R                       | GACGGCAGAGTAGGGAAGCTG      |             |
| <i>Gfi1</i> F                        | TCCGAGTTCGAGGACTTTTG       | 122         |
| <i>Gfi1</i> R                        | CATGCATAGGGCTTGAAAGG       |             |
| <i>Notch1</i> F                      | CCGTGTAAGAATGCTGGAACG      | 254         |
| <i>Notch1</i> R                      | AGCGACAGATGTATGAAGACTCA    |             |
| <i>Hey1</i> F                        | GCGCGGACGAGAATGGAAA        | 190         |
| <i>Hey1</i> R                        | TCAGGTGATCCACAGTCATCTG     |             |
| <i>Hey2</i> F                        | AAGCGCCCTTGTGAGGAAAC       | 104         |
| <i>Hey2</i> R                        | GGTAGTTGTCTGGTGAATTGGAC    |             |
| <i>Hes1</i> F                        | CCAGCCAGTGTCAACACGA        | 126         |
| <i>Hes1</i> R                        | AATGCCGGGAGCTATCTTTCT      |             |
| <i>Hes5</i> F                        | AGTCCCAAGGAGAAAAACCGA      | 141         |
| <i>Hes5</i> R                        | GCTGTGTTTCAGGTAGCTGAC      |             |
| <i>Dll4</i> F                        | GCACCTTTGGCAATGTCT         | 105         |
| <i>Dll4</i> R                        | GCTTGGATGTTGAGTGAGA        |             |
| <i>Mettl3</i> F                      | TGATTGAGGTAAAGCGAGGTC      | 310         |
| <i>Mettl3</i> R                      | TCCTGACTGACCTTCTTGCTC      |             |
| <i>Notch1</i> m <sup>6</sup> A-RIP F | GCATCCCTCCAAACAGCATC       | 185         |
| <i>Notch1</i> m <sup>6</sup> A-RIP R | TCCACCCACATTCCAGCAC        |             |

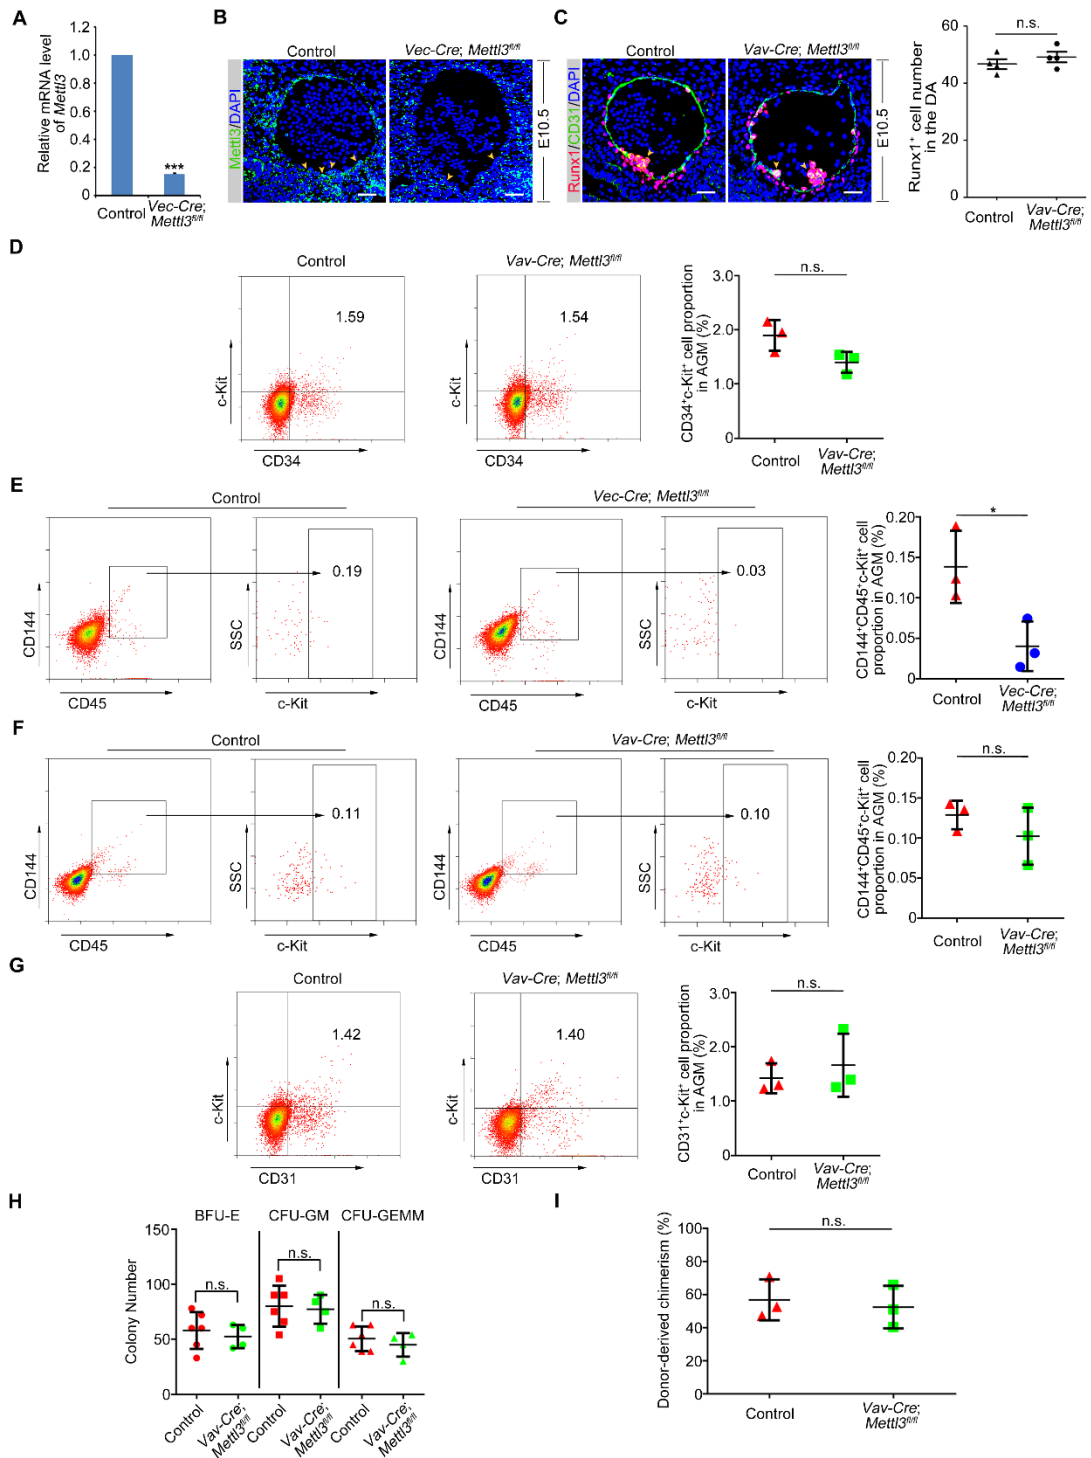

**Figure S1. The function of HSPC is relatively normal in E10.5 *Vav-Cre; Mettl3<sup>fl/fl</sup>* embryos.**

(A, B) mRNA and protein levels of *Mettl3* in the E10.5 control and *Vec-Cre; Mettl3<sup>fl/fl</sup>* AGM. (C) Immunofluorescence on the sections of control and *Vav-Cre; Mettl3<sup>fl/fl</sup>* AGM at E10.5 with anti-Runx1 and anti-CD31 antibodies. Yellow arrowheads mark hematopoietic clusters. The right panel is the quantification of Runx1 positive cells in the DA. (D) Flow cytometry analysis of the percentage of HSPCs (CD34<sup>+</sup>c-Kit<sup>+</sup>) in the E10.5 *Vav-Cre; Mettl3<sup>fl/fl</sup>* AGM compared with the control. (E, F) Flow cytometry analysis of the percentage of pre-HSCs (CD144<sup>+</sup>CD45<sup>+</sup>c-Kit<sup>+</sup>) in the E10.5 *Vec-Cre; Mettl3<sup>fl/fl</sup>* and *Vav-Cre; Mettl3<sup>fl/fl</sup>* AGM compared with the control. (G) Flow cytometry analysis of the percentage of HE (CD31<sup>+</sup>c-Kit<sup>+</sup>) cells in the E10.5 *Vav-Cre; Mettl3<sup>fl/fl</sup>* AGM compared with the control. (H) *In vitro* colony-forming unit culture assay to detect the colony-forming ability of HSPCs in the E10.5 control and *Vav-Cre; Mettl3<sup>fl/fl</sup>* AGM. (I) Donor-derived chimerism in PB of recipients 4 weeks post transplantation ( $n=3$  for each group). Student's *t*-test: \*  $p < 0.05$ ; \*\*  $p < 0.01$ ; \*\*\*  $p < 0.001$ . n.s., not significant. Scale bar, 10  $\mu$ m. The statistical results are presented as mean  $\pm$  SEM.

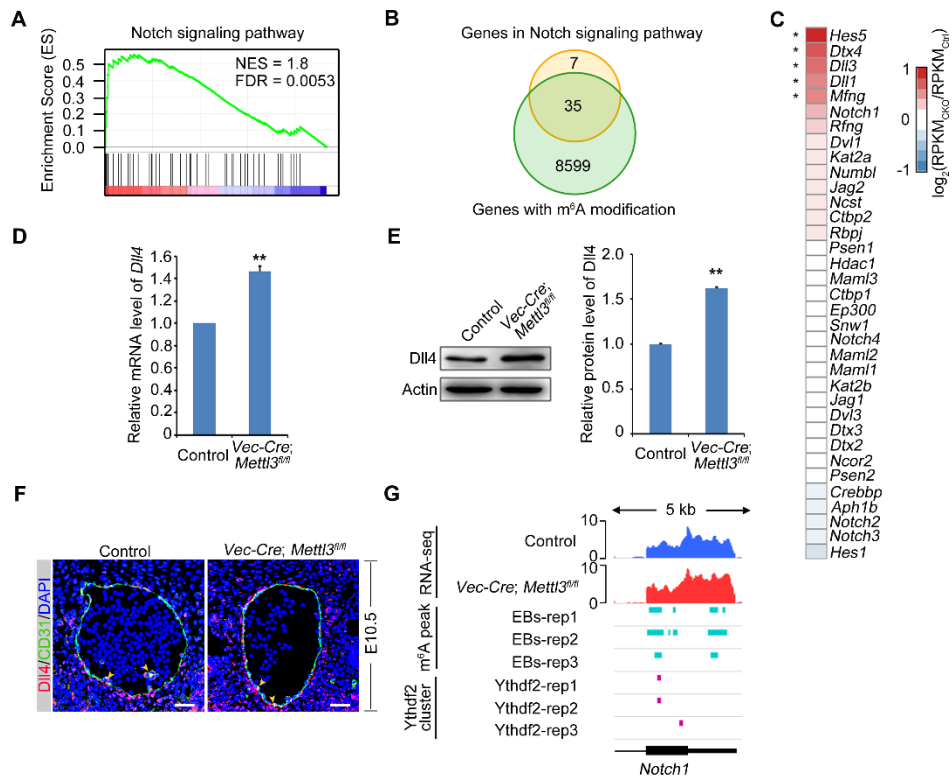



**Figure S2. Notch signaling pathway is over-activated in E10.5 *Vec-Cre; Mettl3<sup>fl/fl</sup>* AGM.**

(A) Gene-Set Enrichment Analysis (GSEA) plots to evaluate the changes of specific genes in Notch signaling pathway in the E10.5 *Vec-Cre; Mettl3<sup>fl/fl</sup>* compared with the control. (B) Venn plots showing about 83.3% (35/42) expressed genes in Notch signaling pathway with m<sup>6</sup>A modifications. m<sup>6</sup>A peak data were downloaded from GSE61995 [12]. (C) The expression levels of genes with m<sup>6</sup>A modifications in the control and *Vec-Cre; Mettl3<sup>fl/fl</sup>* AGM. The asterisk represents genes within significantly differential expression levels upon *Mettl3* deficiency. (D) qPCR showing the mRNA level of *Dll4* in the AGM of control and *Vec-Cre; Mettl3<sup>fl/fl</sup>* embryos at E10.5. (E) Western blotting analysis of protein level of Dll4 in the E10.5 control and *Vec-Cre; Mettl3<sup>fl/fl</sup>* AGM. The right panel is the quantification of the western blotting results. (F) Immunofluorescence analysis of protein level of Dll4 in the E10.5 control and *Vec-Cre; Mettl3<sup>fl/fl</sup>* AGM. (G) Integrative Genomics Viewer (IGV) tracks displaying RNA-seq reads distribution in the control (blue) and *Vec-Cre; Mettl3<sup>fl/fl</sup>* (red) AGM as well as m<sup>6</sup>A peaks (green) (m<sup>6</sup>A peak data were downloaded from GSE61995 [12]) and Ythdf2 cluster (purple) (Ythdf2 cluster data were downloaded from GSE49339 [13]) in the *Notch1* last exon. The details of public data were described in Methods. Student's *t*-test: \*  $p < 0.05$ ; \*\*  $p < 0.01$ ; \*\*\*  $p < 0.001$ . Scale bar, 10  $\mu\text{m}$ . The statistical results are presented as mean  $\pm$  SEM.

## Supplementary References

- 1 Xu K, Yang Y, Feng GH *et al.* Mettl3-mediated m6A regulates spermatogonial differentiation and meiosis initiation. *Cell Res* 2017; **27**:1100-1114.
- 2 Chen MJ, Yokomizo T, Zeigler BM, Dzierzak E, Speck NA. Runx1 is required for the endothelial to haematopoietic cell transition but not thereafter. *Nature* 2009; **457**:887-891.
- 3 Lv J, Wang L, Gao Y, Ding YQ, Liu F. 5-hydroxytryptamine synthesized in the aorta-gonad-mesonephros regulates hematopoietic stem and progenitor cell survival. *J Exp Med* 2017; **214**:529-545.
- 4 Zhang C, Chen Y, Sun B *et al.* m6A modulates haematopoietic stem and progenitor cell specification. *Nature* 2017; **549**:273-276.
- 5 Martin M. Cutadapt removes adapter sequences from high-throughput sequencing reads. *EMBnet J* 2011; **17**:10-12.
- 6 Bolger AM, Lohse M, Usadel B. Trimmomatic: a flexible trimmer for Illumina sequence data. *Bioinformatics* 2014; **30**:2114-2120.
- 7 Kim D, Langmead B, Salzberg SL. HISAT: a fast spliced aligner with low memory requirements. *Nat Methods* 2015; **12**:357-360.
- 8 Anders S, Pyl PT, Huber W. HTSeq--a Python framework to work with high-throughput sequencing data. *Bioinformatics* 2015; **31**:166-169.
- 9 Wang L, Feng Z, Wang X, Wang X, Zhang X. DEGseq: an R package for identifying differentially expressed genes from RNA-seq data. *Bioinformatics* 2010; **26**:136-138.
- 10 Subramanian A, Tamayo P, Mootha VK *et al.* Gene set enrichment analysis: a knowledge-based approach for interpreting genome-wide expression profiles. *Proc Natl Acad Sci U S A* 2005; **102**:15545-15550.
- 11 Mootha VK, Lindgren CM, Eriksson KF *et al.* PGC-1 $\alpha$ -responsive genes involved in oxidative phosphorylation are coordinately downregulated in human diabetes. *Nat Genet* 2003; **34**:267-273.
- 12 Geula S, Moshitch-Moshkovitz S, Dominissini D *et al.* Stem cells. m6A mRNA methylation facilitates resolution of naive pluripotency toward differentiation. *Science* 2015; **347**:1002-1006.
- 13 Wang X, Lu Z, Gomez A *et al.* N6-methyladenosine-dependent regulation of messenger RNA stability. *Nature* 2014; **505**:117-120.
- 14 Wang Y, Song F, Zhu J *et al.* GSA: Genome Sequence Archive. *Genomics Proteomics Bioinformatics* 2017; **15**:14-18.
- 15 Members BIGDC. The BIG Data Center: from deposition to integration to translation. *Nucleic Acids Res* 2017; **45**:D18-D24.
